# Supplementary material for: Influence of warming and atmospheric circulation changes on multidecadal European flood variability
Source: Copernicus journal article supplement (doi:10.5194/cp-18-919-2022), 2022-04-28
Supplement: Supplementary file 1 [file cp-2021-160_Supplementary_Figures.pdf › cp-2021-160_Supplementary_Figures.pdf]

# **Influence of Warming and Atmospheric Circulation Changes on Multidecadal European Flood Variability**

Stefan Brönnimann,<sup>1,2</sup> Peter Stucki,<sup>1,2</sup> Jörg Franke,<sup>1,2</sup> Veronika Valler,<sup>1,2</sup> Yuri Brugnara,<sup>1,2</sup> Ralf Hand,<sup>1,2</sup> Laura C. Slivinski,<sup>3,4</sup> Gilbert P. Compo,<sup>3,4</sup> Prashant D. Sardeshmukh,<sup>3,4</sup> Michel Lang,<sup>5</sup> Bettina Schaepli<sup>1,2</sup>

<sup>1</sup> Oeschger Centre for Climate Change Research, University of Bern, Switzerland

<sup>2</sup> Institute of Geography, University of Bern, Switzerland

<sup>3</sup> University of Colorado, CIRES, Boulder, USA

<sup>4</sup> NOAA Physical Sciences Laboratory, Boulder, USA

<sup>5</sup> INRAE, Lyon-Villeurbanne, France

**Supplementary Table S1**

**Supplementary Figures S1, S2, S3, S4 S5**

## Supplementary Tables

**Supplementary Table S1:** Streamflow series used in the paper with their hydrological characteristics, as well as the precipitation station used for comparison. The 14 long series shown in Fig. 1 are in highlighted bold. Columns r(ann) and r(seas) show the correlation between the streamflow series and the Rx5d series year-round and for seasons, italics denote  $p < 0.05$ .

| GRDC station number | river name     | station name          | Cluster # | country code (ISO 3166) | latitude, decimal degree | longitude, decimal degree | catchment size, km <sup>2</sup> | height of gauge zero, m above sea level | data available from year | data available until year | long-term average discharge, cubic kilometre per second | Precipitation station | latitude, decimal degree | longitude, decimal degree | r(ann)             | r(seas)            |
|---------------------|----------------|-----------------------|-----------|-------------------------|--------------------------|---------------------------|---------------------------------|-----------------------------------------|--------------------------|---------------------------|---------------------------------------------------------|-----------------------|--------------------------|---------------------------|--------------------|--------------------|
| 6935300             | Aare           | Untersiggental/Stilli | 4         | CH                      | 47.5166                  | 8.2348                    | 17601                           | 373.41                                  | 1904                     | 2016                      | 558.2                                                   | Bern                  | 46.99                    | 7.46                      | <i>0.58</i>        | <i>0.59</i>        |
| 6337502             | Aller          | Celle                 | 7         | DE                      | 52.622                   | 10.063                    | 4374                            | 31.8                                    | 1890                     | 2016                      | 27.0                                                    | Clausthal             | 51.79                    | 10.35                     | <i>0.35</i>        | <i>0.33</i>        |
| 6731215             | Bjerkreimselva | Bjerkreim             | 2         | NO                      | 58.58                    | 6.08                      | 633                             | 55                                      | 1897                     | 2015                      | 50.9                                                    | Soyland               | 58.68                    | 5.98                      | <i>0.56</i>        | <i>0.49</i>        |
| 6142200             | Danube         | Achleiten             | 3         | DE                      | 48.5824                  | 13.5044                   | 76653                           | 287.7                                   | 1900                     | 2015                      | 1421.1                                                  | Passau                | 48.58                    | 13.42                     | <i>0.44</i>        | <i>0.51</i>        |
| 6342800             | Danube         | Bratislava            | 3         | SK                      | 48.1396                  | 17.1092                   | 131331                          | 128                                     | 1900                     | 2017                      | 2045.5                                                  | Vienna                | 48.23                    | 16.35                     | <i>0.23</i>        | <i>0.29</i>        |
| 6342900             | Danube         | Hofkirchen            | 3         | DE                      | 48.6766                  | 13.1152                   | 47496                           | 299.6                                   | 1900                     | 2016                      | 636.9                                                   | Munich                | 48.17                    | 11.5                      | <i>0.22</i>        | <i>0.43</i>        |
| 6140700             | Divoka Orlice  | Nekor                 | 6         | CZ                      | 50.0651                  | 16.5404                   | 182.4                           | 431.19                                  | 1906                     | 2018                      | 3.7                                                     | Görlitz               | 51.16                    | 14.95                     | <i>0.25</i>        | <i>0.25</i>        |
| 6340120             | Elbe           | Barby                 | 6         | DE                      | 51.9901                  | 11.8826                   | 94060                           | 46                                      | 1899                     | 2016                      | 551.3                                                   | Jena                  | 50.93                    | 11.58                     | 0.13               | 0.16               |
| 6340110             | Elbe           | Decin                 | 6         | CZ                      | 50.7822                  | 14.2096                   | 51120.3                         | 120.07                                  | 1887                     | 2018                      | 309.3                                                   | Prague                | 50.09                    | 14.42                     | 0.12               | 0.05               |
| <b>6140400</b>      | <b>Elbe</b>    | <b>Dresden</b>        | <b>6</b>  | <b>DE</b>               | <b>51.0597</b>           | <b>13.7385</b>            | <b>53096</b>                    | <b>102.73</b>                           | <b>1806</b>              | <b>2016</b>               | <b>332.2</b>                                            | <b>Chemnitz</b>       | <b>50.79</b>             | <b>12.87</b>              | <b><i>0.28</i></b> | <b><i>0.04</i></b> |
| <b>6340140</b>      | <b>Elbe</b>    | <b>Neu-Darchau</b>    | <b>6</b>  | <b>DE</b>               | <b>53.2323</b>           | <b>10.8888</b>            | <b>131950</b>                   | <b>5.68</b>                             | <b>1874</b>              | <b>2016</b>               | <b>705.9</b>                                            | <b>Marnitz</b>        | <b>53.32</b>             | <b>11.93</b>              | <b><i>0.04</i></b> | <b><i>0.06</i></b> |
| 6340150             | Elbe           | Wittenberge           | 6         | DE                      | 52.9908                  | 11.7598                   | 123532                          | 17                                      | 1899                     | 2016                      | 677.2                                                   | Berlin                | 52.46                    | 13.3                      | 0.15               | 0.10               |
| 6338120             | Ems            | Greven                | 8         | DE                      | 52.094                   | 7.603                     | 2842                            | 32.71                                   | 1900                     | 2016                      | 26.1                                                    | Münster               | 51.95                    | 7.59                      | <i>0.38</i>        | <i>0.31</i>        |
| 6731403             | Glomma         | Solbergfoss           | -         | NO                      | 59.6373                  | 11.1535                   | 40540                           | 101                                     | 1901                     | 2013                      | 690.6                                                   | Orje                  | 59.48                    | 11.65                     | 0.10               | 0.08               |
| 6342200             | Iller          | Kempton               | 3         | DE                      | 47.7304                  | 10.3169                   | 954.6                           | 656                                     | 1900                     | 2016                      | 46.4                                                    | Kempton               | 47.72                    | 10.34                     | <i>0.50</i>        | <i>0.49</i>        |
| 6342830             | Ilz            | Kalteneck             | 7         | DE                      | 48.6889                  | 13.4519                   | 762                             | 327.97                                  | 1900                     | 2016                      | 16.1                                                    | Riedlhütte            | 48.89                    | 13.43                     | <i>0.51</i>        | <i>0.48</i>        |
| 6343100             | Inn            | Martinsbruck          | -         | CH                      | 46.8858                  | 10.4654                   | 1945                            | 1076.537                                | 1904                     | 2016                      | 55.9                                                    | Bever                 | 46.5                     | 9.85                      | <i>0.35</i>        | <i>0.32</i>        |
| 6943100             | Inn            | Wasserburg            | 3         | DE                      | 48.0593                  | 12.2342                   | 11983                           | 420.45                                  | 1826                     | 2016                      | 354.2                                                   | Ebersberg             | 48.1                     | 11.99                     | <i>0.48</i>        | <i>0.49</i>        |
| <b>6607830</b>      | <b>Lea</b>     | <b>Feildes Weir</b>   | <b>1</b>  | <b>GB</b>               | <b>51.7642</b>           | <b>0.0139</b>             | <b>1036</b>                     | <b>27.7</b>                             | <b>1879</b>              | <b>2018</b>               | <b>4.4</b>                                              | <b>Rothamsted</b>     | <b>51.81</b>             | <b>0.36</b>               | <b><i>0.24</i></b> | <b><i>0.14</i></b> |
| 6342513             | Lech           | Landsberg             | 3         | DE                      | 48.0415                  | 10.8751                   | 2295                            | 584.41                                  | 1900                     | 2016                      | 82.4                                                    | Hohenpeissenberg      | 47.8                     | 11.01                     | <i>0.51</i>        | <i>0.44</i>        |
| <b>6335500</b>      | <b>Main</b>    | <b>Schweinfurt</b>    | <b>7</b>  | <b>DE</b>               | <b>50.0312</b>           | <b>10.2208</b>            | <b>12715</b>                    | <b>201.16</b>                           | <b>1844</b>              | <b>2016</b>               | <b>103.2</b>                                            | <b>Bamberg</b>        | <b>49.88</b>             | <b>10.92</b>              | <b><i>0.17</i></b> | <b><i>0.18</i></b> |
| <b>6335301</b>      | <b>Main</b>    | <b>Würzburg</b>       | <b>7</b>  | <b>DE</b>               | <b>49.796</b>            | <b>9.926</b>              | <b>14031</b>                    | <b>164.55</b>                           | <b>1823</b>              | <b>2016</b>               | <b>108.9</b>                                            | <b>Bamberg</b>        | <b>49.88</b>             | <b>10.92</b>              | <b><i>0.19</i></b> | <b><i>0.23</i></b> |

|                      |                |                          |          |           |                |                |               |                |             |             |               |                     |       |       |       |       |
|----------------------|----------------|--------------------------|----------|-----------|----------------|----------------|---------------|----------------|-------------|-------------|---------------|---------------------|-------|-------|-------|-------|
| 6336050              | Moselle        | Cochem                   | 8        | DE        | 50.1434        | 7.1683         | 27088         | 77             | 1900        | 2016        | 313.8         | Karlsruhe           | 49.04 | 8.36  | 0.31  | 0.30  |
| 6731217              | Ognaelvi       | Helleland                | 2        | NO        | 58.5336        | 6.1503         | 185           | 86             | 1896        | 2015        | 13.7          | Soyland             | 58.68 | 5.98  | 0.42  | 0.30  |
| 6935310              | Reuss          | Mellingen                | 4        | CH        | 47.421         | 8.2713         | 3382          | 392.631        | 1904        | 2016        | 139.2         | Engelberg           | 46.8  | 8.4   | 0.43  | 0.46  |
| <b>not from GRDC</b> | <b>Rhine</b>   | <b>Basel/Schifflande</b> | <b>4</b> | <b>CH</b> | <b>47.5599</b> | <b>7.5884</b>  | <b>35905</b>  | <b>292.887</b> | <b>1808</b> | <b>1995</b> | <b>1042.4</b> | <b>Basel</b>        | 47.53 | 7.58  | 0.43  | 0.48  |
| 6935051              | Rhine          | Domat/Ems                | -        | CH        | 46.8377        | 9.4561         | 3229          | 622.884        | 1899        | 2016        | 117.4         | Bad Ragaz           | 47    | 9.5   | 0.30  | 0.30  |
| 6935052              | Rhine          | Düsseldorf               | 8        | DE        | 51.2255        | 6.7702         | 147680        | 24.48          | 1900        | 2016        | 2126.9        | Karlsruhe           | 49.04 | 8.36  | 0.29  | 0.29  |
| <b>6935145</b>       | <b>Rhine</b>   | <b>Köln</b>              | <b>8</b> | <b>DE</b> | <b>50.937</b>  | <b>6.9633</b>  | <b>144232</b> | <b>34.97</b>   | <b>1816</b> | <b>2016</b> | <b>2085.4</b> | <b>Karlsruhe</b>    | 49.04 | 8.36  | 0.28  | 0.29  |
| 6335050              | Rhine          | Lobith                   | 8        | NL        | 51.84          | 6.11           | 160800        | 8.53           | 1901        | 2017        | 2214.1        | Roermond            | 51.18 | 5.97  | 0.18  | 0.18  |
| 6435060              | Rhine          | Neuhausen                | -        | CH        | 47.6823        | 8.6259         | 11887         | 429.577        | 1904        | 2016        | 369.4         | St. Gallen          | 47.4  | 9.4   | 0.25  | 0.27  |
| <b>6935054</b>       | <b>Rhine</b>   | <b>Rees</b>              | <b>8</b> | <b>DE</b> | <b>51.7569</b> | <b>6.3954</b>  | <b>159300</b> | <b>8</b>       | <b>1814</b> | <b>2016</b> | <b>2252.0</b> | <b>Roermond</b>     | 51.18 | 5.97  | 0.15  | 0.15  |
| 6935055              | Rhine          | Rekingen                 | -        | CH        | 47.5704        | 8.33           | 14718         | 370.174        | 1904        | 2016        | 441.2         | Zurich              | 47.38 | 8.57  | 0.46  | 0.46  |
| <b>not from GRDC</b> | <b>Rhône</b>   | <b>Beaucaire</b>         | <b>5</b> | <b>FR</b> | <b>43.92</b>   | <b>4.67</b>    | <b>95590</b>  | <b>3</b>       | <b>1816</b> | <b>2017</b> | <b>1692.6</b> | <b>Montélimar</b>   | 44.58 | 4.73  | 0.35  | 0.39  |
| 6939200              | Rhône          | Chancy                   | 5        | CH        | 46.153         | 5.9707         | 10323         | 388.729        | 1904        | 2016        | 340.6         | Geneva              | 46.2  | 6.15  | 0.35  | 0.34  |
| 6939050              | Rhône          | Porte-du-Scex            | -        | CH        | 46.3495        | 6.8886         | 5244          | 428.582        | 1905        | 2016        | 180.6         | Sion                | 46.22 | 7.33  | -0.06 | -0.06 |
| 6343560              | Saalach        | Unterjettenberg          | 3        | DE        | 47.6812        | 12.8228        | 927.3         | 494            | 1900        | 2016        | 38.2          | Schneizhreuth       | 47.67 | 12.77 | 0.65  | 0.64  |
| <b>6343500</b>       | <b>Salzach</b> | <b>Burghausen</b>        | <b>3</b> | <b>DE</b> | <b>48.1586</b> | <b>12.8343</b> | <b>6649</b>   | <b>352</b>     | <b>1826</b> | <b>2016</b> | <b>258.8</b>  | <b>Kremsmünster</b> | 48.06 | 14.13 | 0.60  | 0.62  |
| <b>6607651</b>       | <b>Thames</b>  | <b>Kingston</b>          | <b>1</b> | <b>GB</b> | <b>51.4154</b> | <b>-0.3077</b> | <b>9948</b>   | <b>4.7</b>     | <b>1883</b> | <b>2018</b> | <b>78.9</b>   | <b>Oxford</b>       | 51.76 | -1.26 | 0.16  | 0.15  |
| 6935400              | Thur           | Andelfingen              | 4        | CH        | 47.5965        | 8.682          | 1696          | 402.751        | 1904        | 2016        | 46.9          | Säntis              | 47.25 | 9.35  | 0.29  | 0.32  |
| 6731371              | Tovdalselva    | Flaksvatn                | 2        | NO        | 58.3305        | 8.2031         | 1780.6        | 19             | 1899        | 2014        | 61.0          | Mestad              | 58.22 | 7.89  | 0.48  | 0.53  |
| <b>6337100</b>       | <b>Weser</b>   | <b>Bodenwerder</b>       | <b>7</b> | <b>DE</b> | <b>51.973</b>  | <b>9.516</b>   | <b>15924</b>  | <b>69.39</b>   | <b>1839</b> | <b>2016</b> | <b>145.6</b>  | <b>Göttingen</b>    | 51.56 | 9.85  | 0.29  | 0.27  |
| <b>6337400</b>       | <b>Weser</b>   | <b>Hann. Münden</b>      | <b>7</b> | <b>DE</b> | <b>51.426</b>  | <b>9.641</b>   | <b>12442</b>  | <b>114.95</b>  | <b>1831</b> | <b>2016</b> | <b>109.8</b>  | <b>Creuzburg</b>    | 51.06 | 10.25 | 0.22  | 0.28  |
| <b>6337514</b>       | <b>Weser</b>   | <b>Intschede</b>         | <b>7</b> | <b>DE</b> | <b>52.964</b>  | <b>9.125</b>   | <b>37720</b>  | <b>4.79</b>    | <b>1857</b> | <b>2016</b> | <b>320.5</b>  | <b>Rotenburg</b>    | 53.13 | 9.34  | 0.04  | 0.07  |
| 6337200              | Weser          | Vlotho                   | 7        | DE        | 52.176         | 8.862          | 17618         | 41.66          | 1820        | 2016        | 170.7         | Göttingen           | 51.56 | 9.85  | 0.27  | 0.24  |

## Supplementary Figures

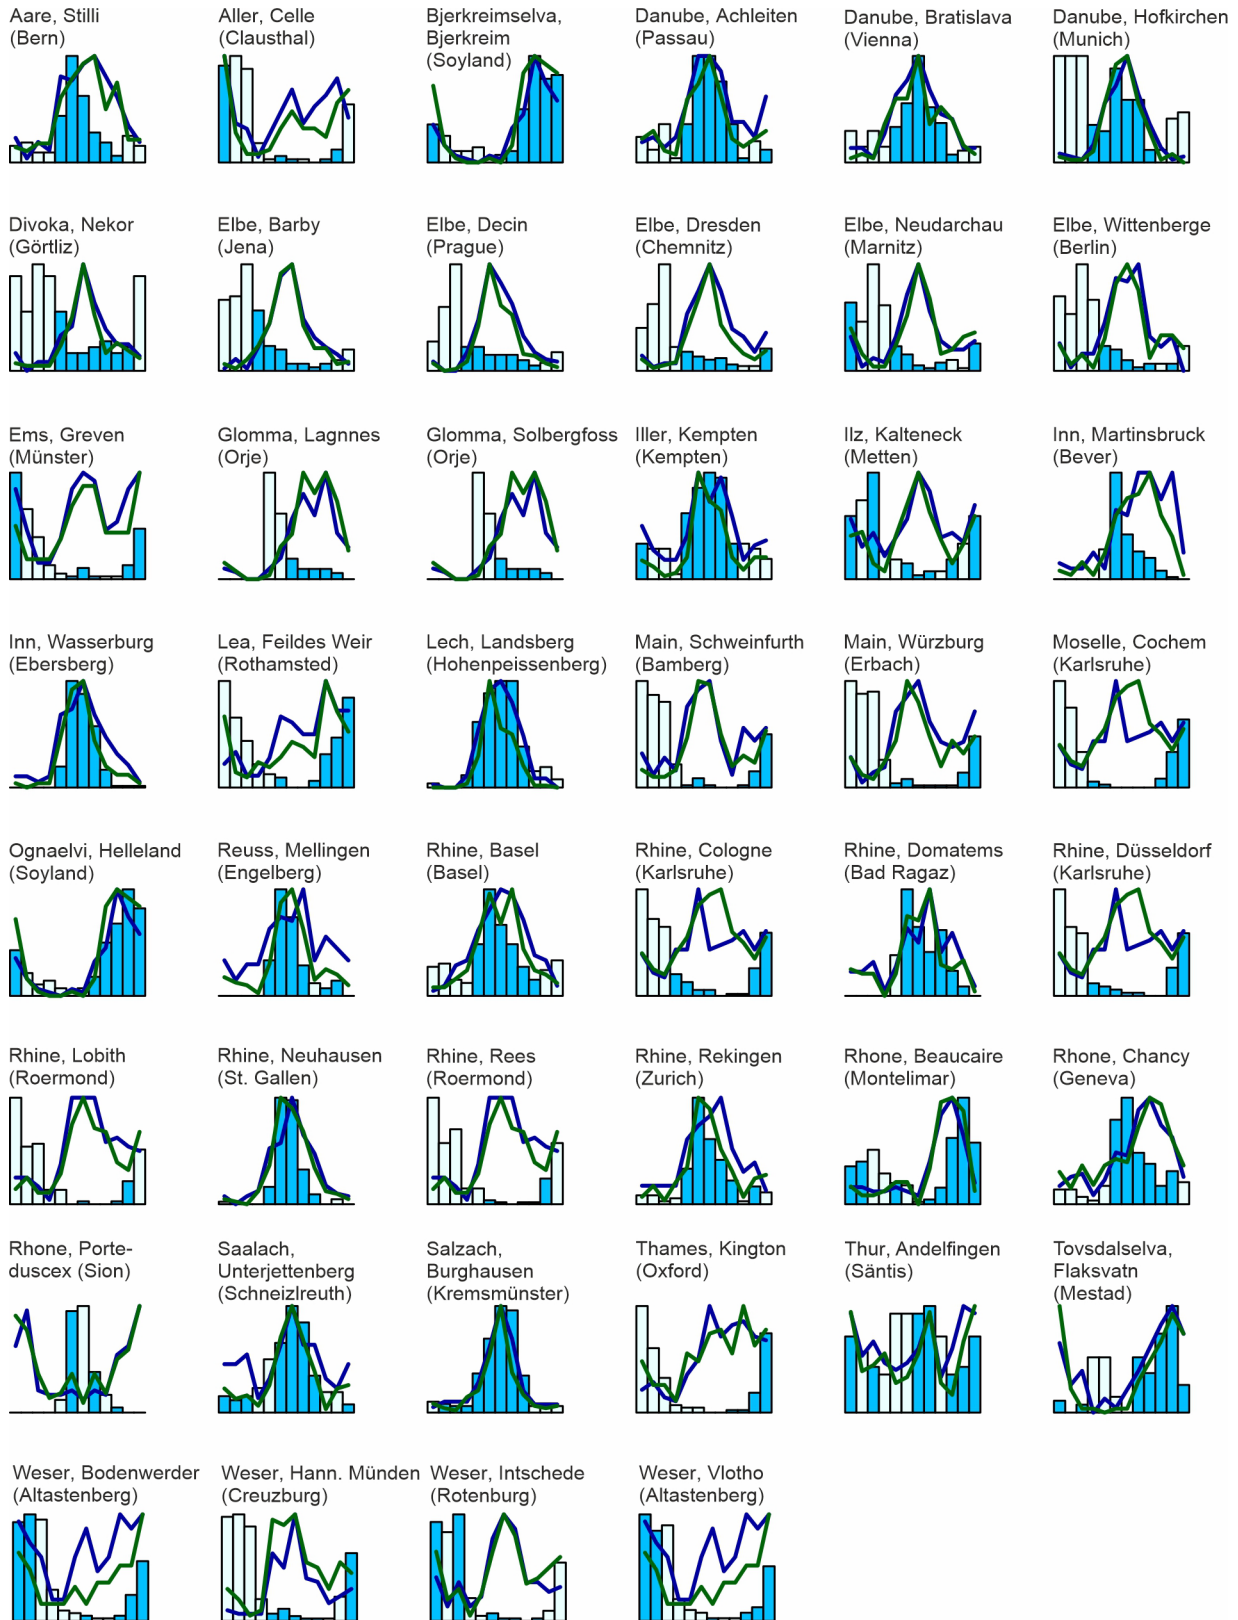

**Fig. S1:** Seasonality of annual peak streamflow (bars), Rx5day (blue) and Rx20day (green). The streamflow bars pertaining to the six months with highest Rx5day are marked in blue. Lines and bars are scaled between 0 and the maximum.



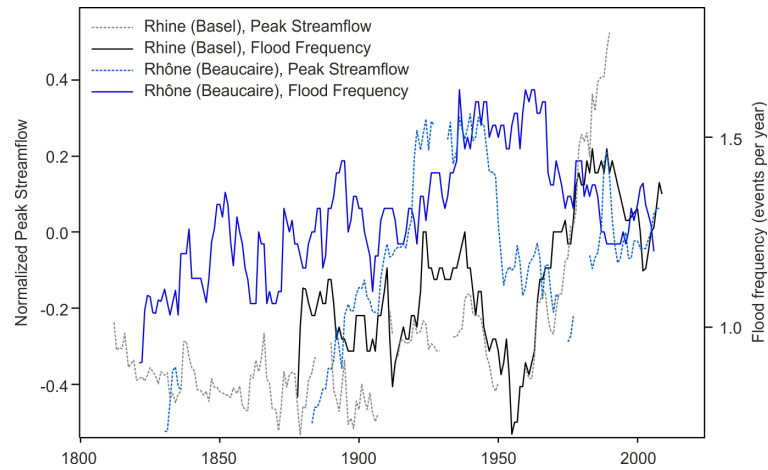

**Fig. S2:** Time series of flood intensity (normalized peak stream flow) and flood frequency (exceedance of 98<sup>th</sup> percentile after declustering) in the daily series from the Rhône (Beaucaire) and Rhine (Basel), smoothed with a 30-yr moving average.

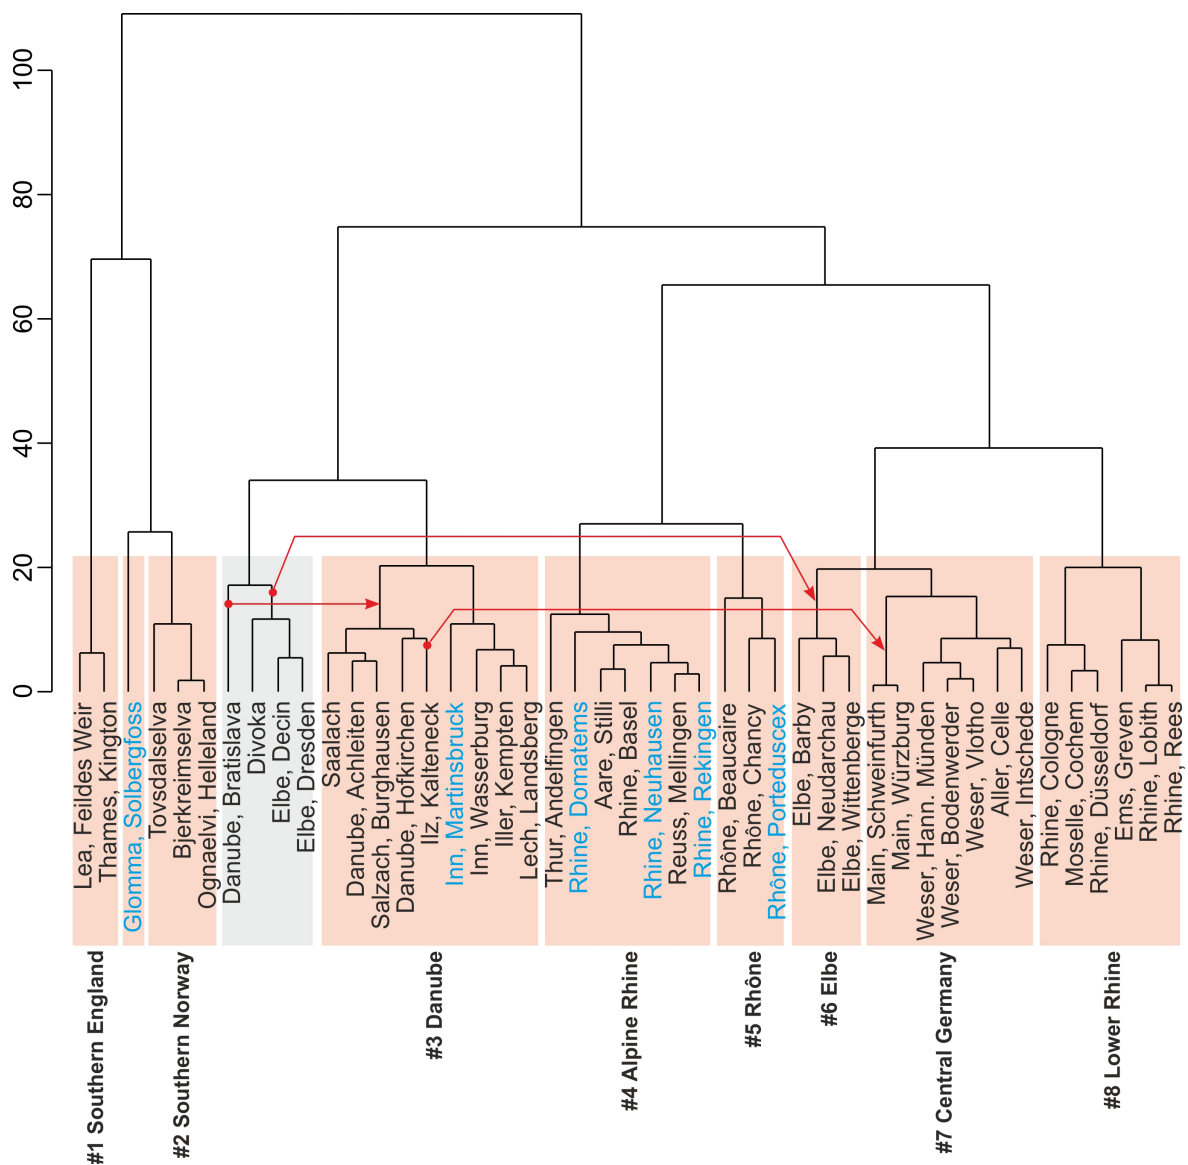

**Fig. S3:** Dendrogram of Ward cluster analysis and chosen regionalization (boxes – the grey cluster was split). Red points and arrows: Streamflow series that were assigned to another cluster (blue: series shown in Fig. 2).

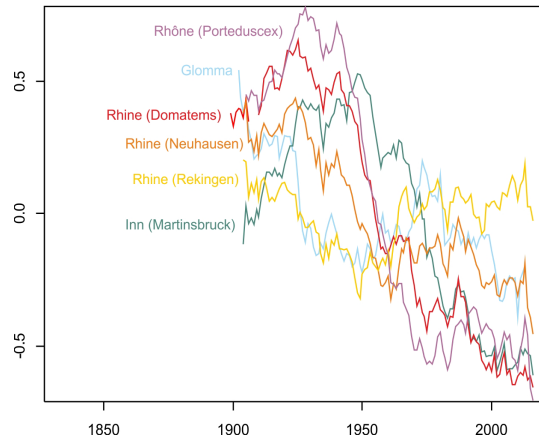

**Fig. S4:** Streamflow series (normalized, smoothed with a 30-yr moving average) that were excluded from the main analysis (see Section 2.2 and Fig. 2).

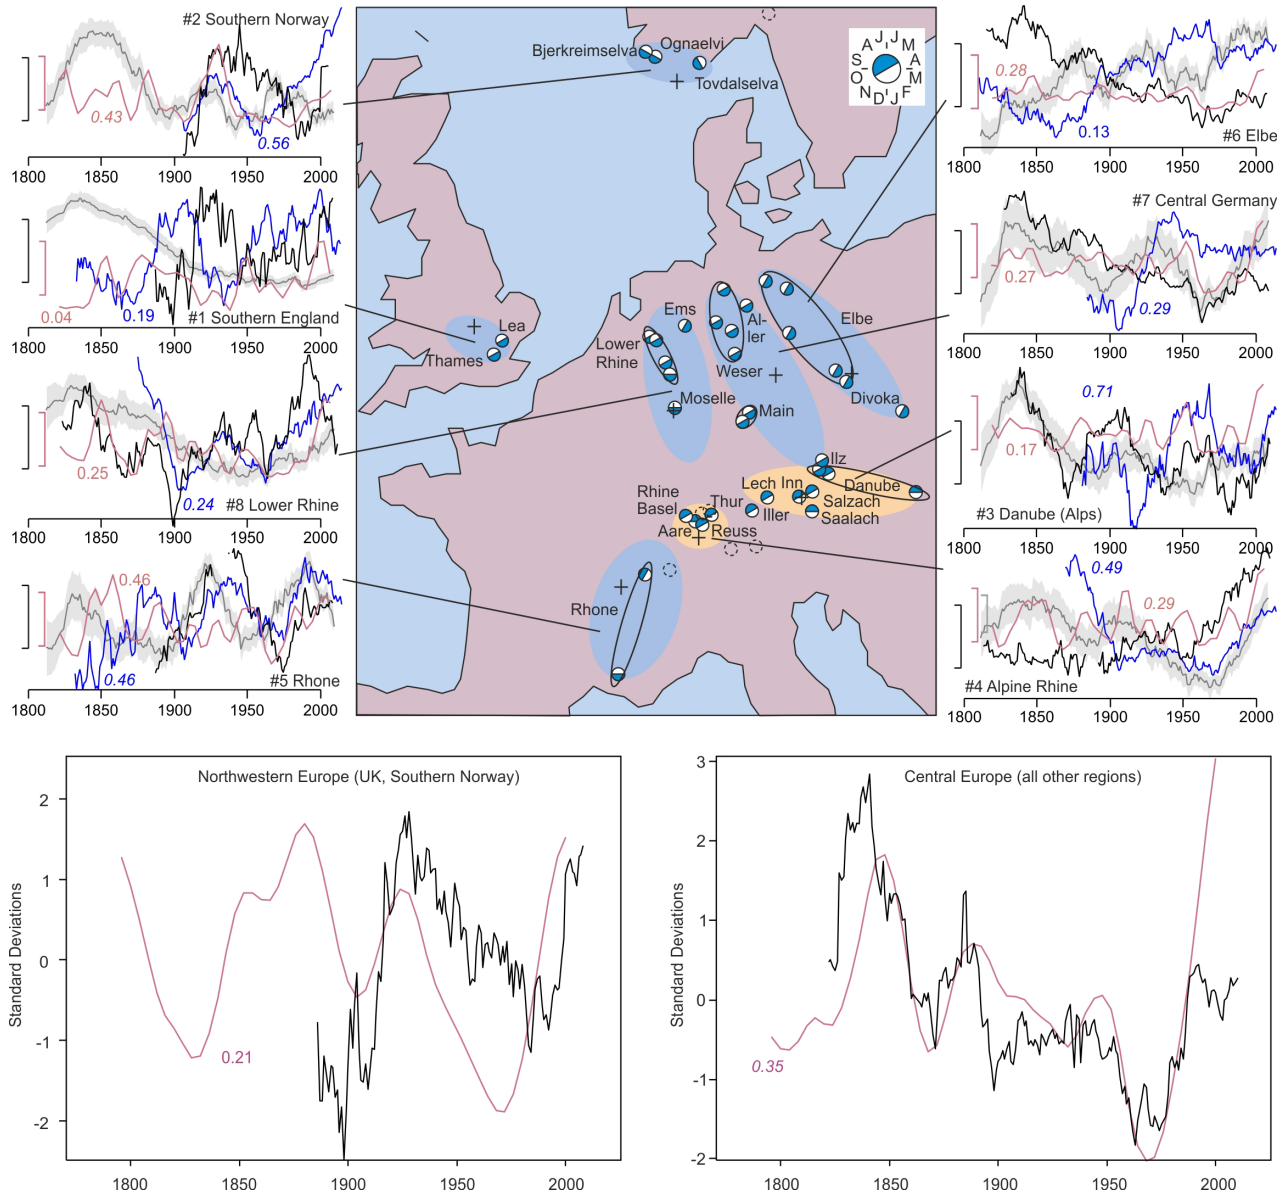

Same selection as Fig. 5a (min. 4 regions must have data)

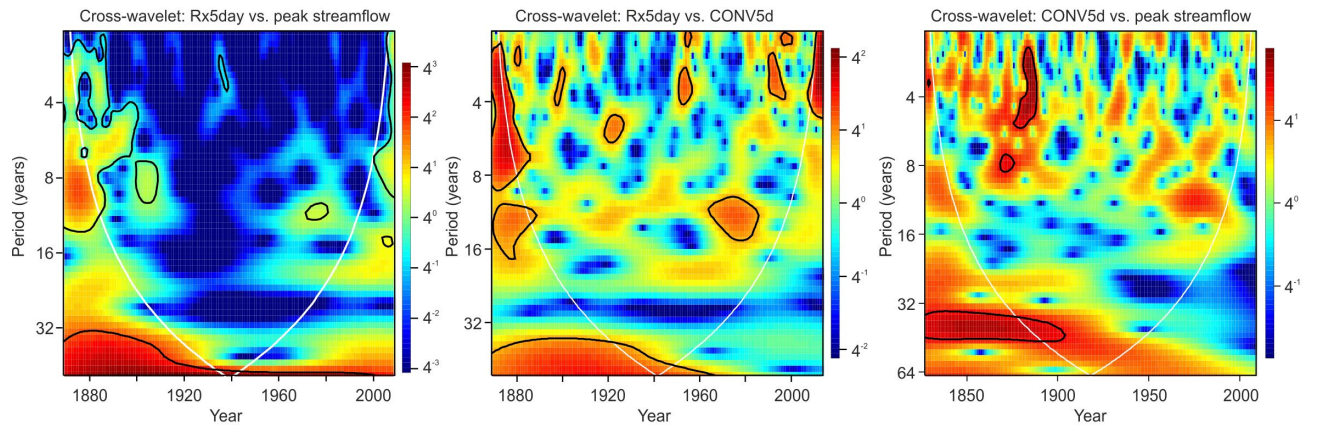

Longest possible period

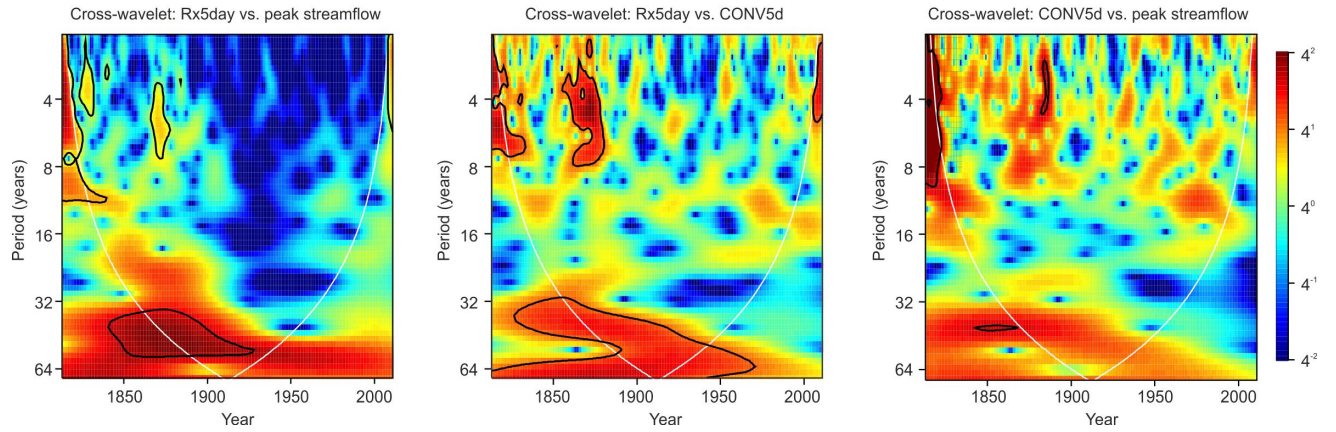

**Fig. S6:** Cross-wavelet analysis of Rx5day, flood intensity (normalized peak streamflow) and CONV5d averaged over all regions for (top) the time period in which at least 4 series have data and (bottom) the period after 1832 (note that the number of contributing regions can drop below 4).

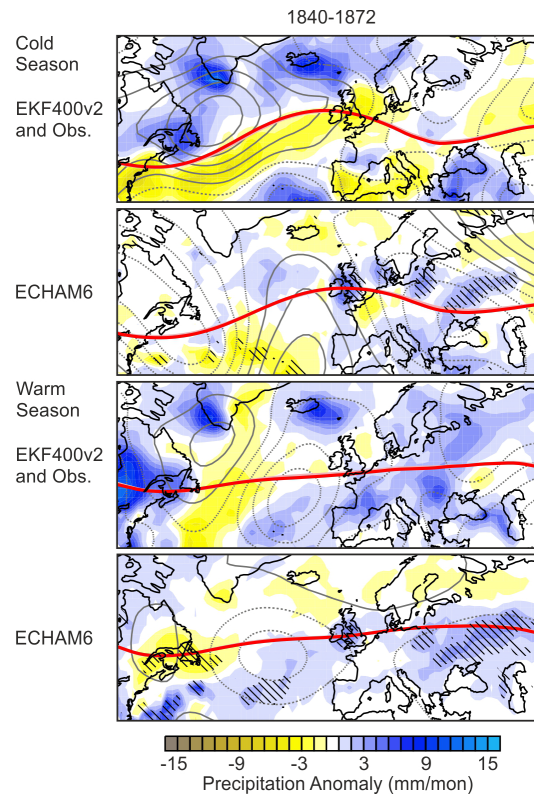

**Fig. S7.** Same as Fig. 8, but for the period 1840-1872. Note that ECHAM6 simulations start only in 1851.
