# Supplementary material for: Influence of warming and atmospheric circulation changes on multidecadal European flood variability
Source: Copernicus journal article supplement (doi:10.5194/cp-18-919-2022), 2022-04-28
Supplement: Supplementary file [file cp-18-919-2022-supplement-title-page.pdf › cp-18-919-2022-supplement-title-page.pdf]

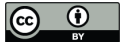

## *Supplement of*

# **Influence of warming and atmospheric circulation changes on multidecadal European flood variability**

**Stefan Brönnimann et al.**

*Correspondence to:* Stefan Brönnimann ([stefan.broennimann@giub.unibe.ch](mailto:stefan.broennimann@giub.unibe.ch))

- cp-18-919-2022-supplement-title-page.pdf
- Code
  - Broennimann\_flood\_code.R
  - fpi.Basel.Rhone.R
- InputData
  - CAP7\_1763-2009.txt
  - CONV5d.ann.30mv.SCALED.MEAN.txt
  - CONV5d.ann.30mv.SCALED.SD.txt
  - CONV5d.ann.all.30mv.txt
  - CONV5d.ann.all.partitioned.30mv.txt
  - CONV5d.ann.all.partitioned.txt
  - CONV5d.ann.all.txt
  - CONV5d.seas.30mv.SCALED.MEAN.txt
  - CONV5d.seas.30mv.SCALED.SD.txt
  - CONV5d.seas.all.30mv.txt
  - CONV5d.seas.all.partitioned.30mv.txt
  - CONV5d.seas.all.partitioned.txt
  - CONV5d.seas.all.txt
  - LWT\_ERA5.txt
  - Output
    - \* CONV5d.all.region1.ps
    - \* CONV5d.all.region2.ps
    - \* CONV5d.all.region3.ps
    - \* CONV5d.all.region4.ps
    - \* CONV5d.all.region5.ps

- \* CONV5d.all.region6.ps
- \* CONV5d.all.region7.ps
- \* CONV5d.all.region8.ps
- \* CONV5d.seas.region1.ps
- \* CONV5d.seas.region2.ps
- \* CONV5d.seas.region3.ps
- \* CONV5d.seas.region4.ps
- \* CONV5d.seas.region5.ps
- \* CONV5d.seas.region6.ps
- \* CONV5d.seas.region7.ps
- \* CONV5d.seas.region8.ps
- \* aare\_bern\_Rx5d\_gamma\_allyear.txt
- \* aare\_bern\_Rx5d\_gamma\_season.txt
- \* aare\_flood\_season\_gamma.txt
- \* aare\_flood\_season\_series.txt
- \* aare\_flood\_yearround\_gamma.txt
- \* aare\_flood\_yearround\_series.txt
- \* all\_sites\_floods.season.gamma.txt
- \* all\_sites\_floods.season.txt
- \* all\_sites\_floods.yearround.gamma.txt
- \* all\_sites\_floods.yearround.txt
- \* all\_sites\_rx5d.season.gamma.txt
- \* all\_sites\_rx5d.season.txt
- \* all\_sites\_rx5d.yearround.gamma.txt
- \* all\_sites\_rx5d.yearround.txt
- \* aller\_celle\_flood\_season\_gamma.txt
- \* aller\_celle\_flood\_season\_series.txt
- \* aller\_celle\_flood\_yearround\_gamma.txt
- \* aller\_celle\_flood\_yearround\_series.txt
- \* aller\_clausthal\_Rx5d\_gamma\_allyear.txt
- \* aller\_clausthal\_Rx5d\_gamma\_season.txt
- \* bjerkreimselva\_flood\_season\_gamma.txt
- \* bjerkreimselva\_flood\_season\_series.txt
- \* bjerkreimselva\_flood\_yearround\_gamma.txt
- \* bjerkreimselva\_flood\_yearround\_series.txt
- \* bjerkreimselva\_soyland\_Rx5d\_gamma\_allyear.txt
- \* bjerkreimselva\_soyland\_Rx5d\_gamma\_season.txt
- \* cor.Rx5d.streamflow.per.river.txt
- \* danube\_achleiten\_flood\_season\_gamma.txt
- \* danube\_achleiten\_flood\_season\_series.txt
- \* danube\_achleiten\_flood\_yearround\_gamma.txt
- \* danube\_achleiten\_flood\_yearround\_series.txt
- \* danube\_bratislava\_flood\_season\_gamma.txt
- \* danube\_bratislava\_flood\_season\_series.txt
- \* danube\_bratislava\_flood\_yearround\_gamma.txt
- \* danube\_bratislava\_flood\_yearround\_series.txt
- \* danube\_bratislava\_vienna\_Rx5d\_gamma\_allyear.txt

- \* danube\_bratislava\_vienna\_Rx5d\_gamma\_season.txt
- \* danube\_hofkirchen\_flood\_season\_gamma.txt
- \* danube\_hofkirchen\_flood\_season\_series.txt
- \* danube\_hofkirchen\_flood\_yearround\_gamma.txt
- \* danube\_hofkirchen\_flood\_yearround\_series.txt
- \* danube\_hofkirchen\_muenchen\_Rx5d\_gamma\_allyear.txt
- \* danube\_hofkirchen\_muenchen\_Rx5d\_gamma\_season.txt
- \* danubeachleiten\_passau\_Rx5d\_gamma\_allyear.txt
- \* danubeachleiten\_passau\_Rx5d\_gamma\_season.txt
- \* divoka\_flood\_season\_gamma.txt
- \* divoka\_flood\_season\_series.txt
- \* divoka\_flood\_yearround\_gamma.txt
- \* divoka\_flood\_yearround\_series.txt
- \* divoka\_goerlitz\_Rx5d\_gamma\_allyear.txt
- \* divoka\_goerlitz\_Rx5d\_gamma\_season.txt
- \* elbe\_barby\_flood\_season\_gamma.txt
- \* elbe\_barby\_flood\_season\_series.txt
- \* elbe\_barby\_flood\_yearround\_gamma.txt
- \* elbe\_barby\_flood\_yearround\_series.txt
- \* elbe\_decin\_flood\_season\_gamma.txt
- \* elbe\_decin\_flood\_season\_series.txt
- \* elbe\_decin\_flood\_yearround\_gamma.txt
- \* elbe\_decin\_flood\_yearround\_series.txt
- \* elbe\_decin\_praha\_Rx5d\_gamma\_allyear.txt
- \* elbe\_decin\_praha\_Rx5d\_gamma\_season.txt
- \* elbe\_dresden\_chemnitz\_Rx5d\_gamma\_allyear.txt
- \* elbe\_dresden\_chemnitz\_Rx5d\_gamma\_season.txt
- \* elbe\_dresden\_flood\_season\_gamma.txt
- \* elbe\_dresden\_flood\_season\_series.txt
- \* elbe\_dresden\_flood\_yearround\_gamma.txt
- \* elbe\_dresden\_flood\_yearround\_series.txt
- \* elbe\_jena\_Rx5d\_gamma\_allyear.txt
- \* elbe\_jena\_Rx5d\_gamma\_season.txt
- \* elbe\_neudarchau\_flood\_season\_gamma.txt
- \* elbe\_neudarchau\_flood\_season\_series.txt
- \* elbe\_neudarchau\_flood\_yearround\_gamma.txt
- \* elbe\_neudarchau\_flood\_yearround\_series.txt
- \* elbe\_neudarchau\_marnitz\_Rx5d\_gamma\_allyear.txt
- \* elbe\_neudarchau\_marnitz\_Rx5d\_gamma\_season.txt
- \* elbe\_wittenberge\_berlin\_Rx5d\_gamma\_allyear.txt
- \* elbe\_wittenberge\_berlin\_Rx5d\_gamma\_season.txt
- \* elbe\_wittenberge\_flood\_season\_gamma.txt
- \* elbe\_wittenberge\_flood\_season\_series.txt
- \* elbe\_wittenberge\_flood\_yearround\_gamma.txt
- \* elbe\_wittenberge\_flood\_yearround\_series.txt
- \* ems\_greven\_flood\_season\_gamma.txt
- \* ems\_greven\_flood\_season\_series.txt

- \* ems\_greven\_flood\_yearround\_gamma.txt
- \* ems\_greven\_flood\_yearround\_series.txt
- \* ems\_muenster\_Rx5d\_gamma\_allyear.txt
- \* ems\_muenster\_Rx5d\_gamma\_season.txt
- \* glomma\_langnes\_flood\_season\_gamma.txt
- \* glomma\_langnes\_flood\_season\_series.txt
- \* glomma\_langnes\_flood\_yearround\_gamma.txt
- \* glomma\_langnes\_flood\_yearround\_series.txt
- \* glomma\_solbergfoss\_flood\_season\_gamma.txt
- \* glomma\_solbergfoss\_flood\_season\_series.txt
- \* glomma\_solbergfoss\_flood\_yearround\_gamma.txt
- \* glomma\_solbergfoss\_flood\_yearround\_series.txt
- \* glomma\_orje\_Rx5d\_gamma\_allyear.txt
- \* glomma\_orje\_Rx5d\_gamma\_season.txt
- \* iller\_kempten\_Rx5d\_gamma\_allyear.txt
- \* iller\_kempten\_Rx5d\_gamma\_season.txt
- \* iller\_kempten\_flood\_season\_gamma.txt
- \* iller\_kempten\_flood\_season\_series.txt
- \* iller\_kempten\_flood\_yearround\_gamma.txt
- \* iller\_kempten\_flood\_yearround\_series.txt
- \* ilz\_kalteneck\_flood\_season\_gamma.txt
- \* ilz\_kalteneck\_flood\_season\_series.txt
- \* ilz\_kalteneck\_flood\_yearround\_gamma.txt
- \* ilz\_kalteneck\_flood\_yearround\_series.txt
- \* ilz\_riedlhuette\_Rx5d\_gamma\_allyear.txt
- \* ilz\_riedlhuette\_Rx5d\_gamma\_season.txt
- \* inn\_flood\_season\_gamma.txt
- \* inn\_flood\_season\_series.txt
- \* inn\_flood\_yearround\_gamma.txt
- \* inn\_flood\_yearround\_series.txt
- \* inn\_martinsbruck\_bever\_Rx5d\_gamma\_allyear.txt
- \* inn\_martinsbruck\_bever\_Rx5d\_gamma\_season.txt
- \* inn\_martinsbruck\_flood\_season\_gamma.txt
- \* inn\_martinsbruck\_flood\_season\_series.txt
- \* inn\_martinsbruck\_flood\_yearround\_gamma.txt
- \* inn\_martinsbruck\_flood\_yearround\_series.txt
- \* inn\_wasserburg\_ebersberg\_Rx5d\_gamma\_allyear.txt
- \* inn\_wasserburg\_ebersberg\_Rx5d\_gamma\_season.txt
- \* lea\_feildesweir\_flood\_season\_gamma.txt
- \* lea\_feildesweir\_flood\_season\_series.txt
- \* lea\_feildesweir\_flood\_yearround\_gamma.txt
- \* lea\_feildesweir\_flood\_yearround\_series.txt
- \* lea\_rothamsted\_Rx5d\_gamma\_allyear.txt
- \* lea\_rothamsted\_Rx5d\_gamma\_season.txt
- \* lech\_hohenpeissenberg\_Rx5d\_gamma\_allyear.txt
- \* lech\_hohenpeissenberg\_Rx5d\_gamma\_season.txt
- \* lech\_hohenpeissenberg\_dailyprecip20d.ps

- \* lech\_hohenpeissenberg\_dailyprecip5d.ps
- \* lech\_landsberg.ps
- \* lech\_landsberg\_flood\_season\_gamma.txt
- \* lech\_landsberg\_flood\_season\_series.txt
- \* lech\_landsberg\_flood\_yearround\_gamma.txt
- \* lech\_landsberg\_flood\_yearround\_series.txt
- \* main\_schweinfurt\_flood\_season\_gamma.txt
- \* main\_schweinfurt\_flood\_season\_series.txt
- \* main\_schweinfurt\_flood\_yearround\_gamma.txt
- \* main\_schweinfurt\_flood\_yearround\_series.txt
- \* main\_schweinfurth\_bamberg\_Rx5d\_gamma\_allyear.txt
- \* main\_schweinfurth\_bamberg\_Rx5d\_gamma\_season.txt
- \* main\_wuerzburg\_flood\_season\_gamma.txt
- \* main\_wuerzburg\_flood\_season\_series.txt
- \* main\_wuerzburg\_flood\_yearround\_gamma.txt
- \* main\_wuerzburg\_flood\_yearround\_series.txt
- \* moselle\_flood\_season\_gamma.txt
- \* moselle\_flood\_season\_series.txt
- \* moselle\_flood\_yearround\_gamma.txt
- \* moselle\_flood\_yearround\_series.txt
- \* moselle\_karlsruhe\_Rx5d\_gamma\_allyear.txt
- \* moselle\_karlsruhe\_Rx5d\_gamma\_season.txt
- \* ognaelvi\_flood\_season\_gamma.txt
- \* ognaelvi\_flood\_season\_series.txt
- \* ognaelvi\_flood\_yearround\_gamma.txt
- \* ognaelvi\_flood\_yearround\_series.txt
- \* ognaelvi\_soyland\_Rx5d\_gamma\_allyear.txt
- \* ognaelvi\_soyland\_Rx5d\_gamma\_season.txt
- \* reuss\_engelberg\_Rx5d\_gamma\_allyear.txt
- \* reuss\_engelberg\_Rx5d\_gamma\_season.txt
- \* reuss\_flood\_season\_gamma.txt
- \* reuss\_flood\_season\_series.txt
- \* reuss\_flood\_yearround\_gamma.txt
- \* reuss\_flood\_yearround\_series.txt
- \* rhine\_badragaz\_Rx5d\_gamma\_allyear.txt
- \* rhine\_badragaz\_Rx5d\_gamma\_season.txt
- \* rhine\_basel\_Rx5d\_gamma\_allyear.txt
- \* rhine\_basel\_Rx5d\_gamma\_season.txt
- \* rhine\_baselrheinhalle\_hom\_flood\_season\_gamma.txt
- \* rhine\_baselrheinhalle\_hom\_flood\_season\_series.txt
- \* rhine\_baselrheinhalle\_homogenized\_flood\_season\_gamma.txt
- \* rhine\_baselrheinhalle\_homogenized\_flood\_season\_series.txt
- \* rhine\_baselrheinhalle\_homogenized\_flood\_yearround\_gamma.txt
- \* rhine\_baselrheinhalle\_homogenized\_flood\_yearround\_series.txt
- \* rhine\_cologne\_flood\_season\_gamma.txt
- \* rhine\_cologne\_flood\_season\_series.txt
- \* rhine\_cologne\_flood\_yearround\_gamma.txt

- \* rhine\_cologne\_flood\_yearround\_series.txt
- \* rhine\_domatems\_flood\_season\_gamma.txt
- \* rhine\_domatems\_flood\_season\_series.txt
- \* rhine\_domatems\_flood\_yearround\_gamma.txt
- \* rhine\_domatems\_flood\_yearround\_series.txt
- \* rhine\_duesseldorf\_flood\_season\_gamma.txt
- \* rhine\_duesseldorf\_flood\_season\_series.txt
- \* rhine\_duesseldorf\_flood\_yearround\_gamma.txt
- \* rhine\_duesseldorf\_flood\_yearround\_series.txt
- \* rhine\_lobith\_flood\_season\_gamma.txt
- \* rhine\_lobith\_flood\_season\_series.txt
- \* rhine\_lobith\_flood\_yearround\_gamma.txt
- \* rhine\_lobith\_flood\_yearround\_series.txt
- \* rhine\_neuhausen\_flood\_season\_gamma.txt
- \* rhine\_neuhausen\_flood\_season\_series.txt
- \* rhine\_neuhausen\_flood\_yearround\_gamma.txt
- \* rhine\_neuhausen\_flood\_yearround\_series.txt
- \* rhine\_neuhausen\_stgallen\_Rx5d\_gamma\_allyear.txt
- \* rhine\_neuhausen\_stgallen\_Rx5d\_gamma\_season.txt
- \* rhine\_rees\_flood\_season\_gamma.txt
- \* rhine\_rees\_flood\_season\_series.txt
- \* rhine\_rees\_flood\_yearround\_gamma.txt
- \* rhine\_rees\_flood\_yearround\_series.txt
- \* rhine\_rekingen\_flood\_season\_gamma.txt
- \* rhine\_rekingen\_flood\_season\_series.txt
- \* rhine\_rekingen\_flood\_yearround\_gamma.txt
- \* rhine\_rekingen\_flood\_yearround\_series.txt
- \* rhine\_rekingen\_zurich\_Rx5d\_gamma\_allyear.txt
- \* rhine\_rekingen\_zurich\_Rx5d\_gamma\_season.txt
- \* rhine\_roermond\_Rx5d\_gamma\_allyear.txt
- \* rhine\_roermond\_Rx5d\_gamma\_season.txt
- \* rhone\_beaucaire\_flood\_season\_gamma.txt
- \* rhone\_beaucaire\_flood\_season\_series.txt
- \* rhone\_beaucaire\_flood\_yearround\_gamma.txt
- \* rhone\_beaucaire\_flood\_yearround\_series.txt
- \* rhone\_beaucaire\_montelimar\_Rx5d\_gamma\_allyear.txt
- \* rhone\_beaucaire\_montelimar\_Rx5d\_gamma\_season.txt
- \* rhone\_chancy\_flood\_season\_gamma.txt
- \* rhone\_chancy\_flood\_season\_series.txt
- \* rhone\_chancy\_flood\_yearround\_gamma.txt
- \* rhone\_chancy\_flood\_yearround\_series.txt
- \* rhone\_chancy\_geneva\_Rx5d\_gamma\_allyear.txt
- \* rhone\_chancy\_geneva\_Rx5d\_gamma\_season.txt
- \* rhone\_portedescex\_sion\_Rx5d\_gamma\_allyear.txt
- \* rhone\_portedescex\_sion\_Rx5d\_gamma\_season.txt
- \* rhone\_porteduscex\_flood\_season\_gamma.txt
- \* rhone\_porteduscex\_flood\_season\_series.txt

- \* rhone\_porteduscex\_flood\_yearround\_gamma.txt
- \* rhone\_porteduscex\_flood\_yearround\_series.txt
- \* saalach\_flood\_season\_gamma.txt
- \* saalach\_flood\_season\_series.txt
- \* saalach\_flood\_yearround\_gamma.txt
- \* saalach\_flood\_yearround\_series.txt
- \* saalach\_schneizldreuth\_Rx5d\_gamma\_allyear.txt
- \* saalach\_schneizldreuth\_Rx5d\_gamma\_season.txt
- \* salzach\_flood\_season\_gamma.txt
- \* salzach\_flood\_season\_series.txt
- \* salzach\_flood\_yearround\_gamma.txt
- \* salzach\_flood\_yearround\_series.txt
- \* salzach\_kremsmuenster\_Rx5d\_gamma\_allyear.txt
- \* salzach\_kremsmuenster\_Rx5d\_gamma\_season.txt
- \* thames\_flood\_season\_gamma.txt
- \* thames\_flood\_season\_series.txt
- \* thames\_flood\_yearround\_gamma.txt
- \* thames\_flood\_yearround\_series.txt
- \* thames\_oxford\_Rx5d\_gamma\_allyear.txt
- \* thames\_oxford\_Rx5d\_gamma\_season.txt
- \* thur\_andelfingen\_flood\_season\_gamma.txt
- \* thur\_andelfingen\_flood\_season\_series.txt
- \* thur\_andelfingen\_flood\_yearround\_gamma.txt
- \* thur\_andelfingen\_flood\_yearround\_series.txt
- \* thur\_saentis\_Rx5d\_gamma\_allyear.txt
- \* thur\_saentis\_Rx5d\_gamma\_season.txt
- \* tovdaselva\_mestad\_Rx5d\_gamma\_allyear.txt
- \* tovdaselva\_mestad\_Rx5d\_gamma\_season.txt
- \* tovsdalselva\_flood\_season\_gamma.txt
- \* tovsdalselva\_flood\_season\_series.txt
- \* tovsdalselva\_flood\_yearround\_gamma.txt
- \* tovsdalselva\_flood\_yearround\_series.txt
- \* weser\_bodenwerder\_flood\_season\_gamma.txt
- \* weser\_bodenwerder\_flood\_season\_series.txt
- \* weser\_bodenwerder\_flood\_yearround\_gamma.txt
- \* weser\_bodenwerder\_flood\_yearround\_series.txt
- \* weser\_goettingen\_Rx5d\_gamma\_allyear.txt
- \* weser\_goettingen\_Rx5d\_gamma\_season.txt
- \* weser\_hannmuenden\_creuzburg\_Rx5d\_gamma\_allyear.txt
- \* weser\_hannmuenden\_creuzburg\_Rx5d\_gamma\_season.txt
- \* weser\_hannmuneden\_flood\_season\_gamma.txt
- \* weser\_hannmuneden\_flood\_season\_series.txt
- \* weser\_hannmuneden\_flood\_yearround\_gamma.txt
- \* weser\_hannmuneden\_flood\_yearround\_series.txt
- \* weser\_intschede\_flood\_season\_gamma.txt
- \* weser\_intschede\_flood\_season\_series.txt
- \* weser\_intschede\_flood\_yearround\_gamma.txt

- \* weser\_intschede\_flood\_yearround\_series.txt
- \* weser\_intschede\_rotenburg\_Rx5d\_gamma\_allyear.txt
- \* weser\_intschede\_rotenburg\_Rx5d\_gamma\_season.txt
- \* weser\_vlotho\_flood\_season\_gamma.txt
- \* weser\_vlotho\_flood\_season\_series.txt
- \* weser\_vlotho\_flood\_yearround\_gamma.txt
- \* weser\_vlotho\_flood\_yearround\_series.txt
- aare.txt
- aare\_bern\_dailyprecip.txt
- aller\_celle.txt
- aller\_clausthal\_dailyprecip.txt
- bjerkreimselva.txt
- bjerkreimselva\_soyland\_dailyprecip.txt
- bloeschl\_regions.txt
- danube\_achleiten.txt
- danube\_bratislava.txt
- danube\_bratislava\_vienna\_dailyprecip.txt
- danube\_hofkirchen.txt
- danube\_hofkirchen\_muenchen\_dailyprecip.txt
- danubeachleiten\_passau\_dailyprecip.txt
- day.txt
- divoka.txt
- divoka\_goerlitz\_dailyprecip.txt
- dqvdx5da.part.30mv.c1.txt
- dqvdx5da.part.30mv.c2.txt
- dqvdx5da.part.30mv.c3.txt
- dqvdx5da.part.30mv.c4.txt
- dqvdx5da.part.30mv.c5.txt
- dqvdx5da.part.30mv.c6.txt
- dqvdx5da.part.30mv.c7.txt
- dqvdx5da.part.30mv.c8.txt
- dqvdx5da.part.c1.txt
- dqvdx5da.part.c2.txt
- dqvdx5da.part.c3.txt
- dqvdx5da.part.c4.txt
- dqvdx5da.part.c5.txt
- dqvdx5da.part.c6.txt
- dqvdx5da.part.c7.txt
- dqvdx5da.part.c8.txt
- dqvdx5ds.part.30mv.c1.txt
- dqvdx5ds.part.30mv.c2.txt
- dqvdx5ds.part.30mv.c3.txt
- dqvdx5ds.part.30mv.c4.txt



- dqvdx5ds.part.30mv.c5.txt
- dqvdx5ds.part.30mv.c6.txt
- dqvdx5ds.part.30mv.c7.txt
- dqvdx5ds.part.30mv.c8.txt
- dqvdx5ds.part.c1.txt
- dqvdx5ds.part.c2.txt
- dqvdx5ds.part.c3.txt
- dqvdx5ds.part.c4.txt
- dqvdx5ds.part.c5.txt
- dqvdx5ds.part.c6.txt
- dqvdx5ds.part.c7.txt
- dqvdx5ds.part.c8.txt
- elbe\_barby.txt
- elbe\_decin.txt
- elbe\_decin\_praha\_dailyprecip.txt
- elbe\_dresden.txt
- elbe\_dresden\_chemnitz\_dailyprecip.txt
- elbe\_jena\_dailyprecip.txt
- elbe\_neudarchau.txt
- elbe\_neudarchau\_marnitz\_dailyprecip.txt
- elbe\_wittenberge.txt
- elbe\_wittenberge\_berlin\_dailyprecip.txt
- ems\_greven.txt
- ems\_muenster\_dailyprecip.txt
- filelist.txt
- filelist\_long.txt
- flood\_frequency.txt
- fpi\_weights\_bas.txt
- fpi\_weights\_rho.txt
- glomma\_langnes.txt
- glomma\_solbergfoss.txt
- glomma\_orje\_dailyprecip.txt
- iller\_kempton.txt
- iller\_kempton\_dailyprecip.txt
- ilz\_kalteneck.txt
- ilz\_riedlhuetten\_dailyprecip.txt
- inn.txt
- inn\_martinsbruck.txt
- inn\_martinsbruck\_bever\_dailyprecip.txt
- inn\_wasserburg\_ebersberg\_dailyprecip.txt
- lea\_feildesweir.txt
- lea\_rothamsted\_dailyprecip.txt

- lech\_hohenpeissenberg\_dailyprecip.txt
- lech\_landsberg.txt
- main\_schweinfurt.txt
- main\_schweinfurth\_bamberg\_dailyprecip.txt
- main\_wuerzburg.txt
- moselle.txt
- moselle\_karlsruhe\_dailyprecip.txt
- ognaelvi.txt
- ognaelvi\_soyland\_dailyprecip.txt
- reuss.txt
- reuss\_engelberg\_dailyprecip.txt
- rhine\_badragaz\_dailyprecip.txt
- rhine\_basel\_dailyprecip.txt
- rhine\_baselrheinhalles\_hom.txt
- rhine\_baselrheinhalles\_hom\_long.txt
- rhine\_baselrheinhalles\_homogenized.txt
- rhine\_cologne.txt
- rhine\_domatens.txt
- rhine\_duesseldorf.txt
- rhine\_lobith.txt
- rhine\_neuhausen.txt
- rhine\_neuhausen\_stgallen\_dailyprecip.txt
- rhine\_rees.txt
- rhine\_rekingen.txt
- rhine\_rekingen\_zurich\_dailyprecip.txt
- rhine\_roermond\_dailyprecip.txt
- rhone\_beaucaire.txt
- rhone\_beaucaire\_montelimar\_dailyprecip.txt
- rhone\_chancy.txt
- rhone\_chancy\_geneva\_dailyprecip.txt
- rhone\_portedescex\_sion\_dailyprecip.txt
- rhone\_porteduscex.txt
- saalach.txt
- saalach\_schneizldreuth\_dailyprecip.txt
- salzach.txt
- salzach\_kremsmuenster\_dailyprecip.txt
- thames.txt
- thames\_oxford\_dailyprecip.txt
- thur\_andelfingen.txt
- thur\_saentis\_dailyprecip.txt
- tovdaselva\_mestad\_dailyprecip.txt
- tovsdalselva.txt

- weser\_bodenwerder.txt
  - weser\_goettingen\_dailyprecip.txt
  - weser\_hannmuenden\_creuzburg\_dailyprecip.txt
  - weser\_hannmuneden.txt
  - weser\_intschede.txt
  - weser\_intschede\_rotenburg\_dailyprecip.txt
  - weser\_vlotho.txt
- cp-2021-160\_Supplementary\_Figures.pdf

The copyright of individual parts of the supplement might differ from the article licence.
